# Supplementary material
Source: PubMed Central journal article supplement (PMC2920133)

1 **Supplemental Table 1. Summary of the best-fit parameters from the Arsd109-As**  
 2 **EXAFS fitting analyses<sup>a</sup>.** Fits in bold are the best fit for each sample.

| Sample  | Ligand Environment <sup>b</sup> |                   |                   |                 | Ligand Environment <sup>b</sup> |                   |                   |                 | F <sup>g</sup> |
|---------|---------------------------------|-------------------|-------------------|-----------------|---------------------------------|-------------------|-------------------|-----------------|----------------|
|         | Atom <sup>c</sup>               | R(Å) <sup>d</sup> | C.N. <sup>e</sup> | Å <sup>2f</sup> | Atom <sup>c</sup>               | R(Å) <sup>d</sup> | C.N. <sup>e</sup> | Å <sup>2f</sup> |                |
| Arsd109 | O/N                             | 2.08              | 3.0               | 0.9             |                                 |                   |                   |                 | 3.86           |
|         | S                               | 2.24              | 3.0               | 2.4             |                                 |                   |                   |                 | 0.89           |
|         | O/N                             | 2.01              | 2.0               | 4.1             | O/N                             | 2.13              | 1.0               | 7.8             | 6.01           |
|         | O/N                             | 2.06              | 0.5               | 4.4             | S                               | 2.24              | 3.0               | 2.6             | 0.84           |
|         | <b>O/N</b>                      | <b>2.06</b>       | <b>0.5</b>        | <b>2.9</b>      | <b>S</b>                        | <b>2.24</b>       | <b>3.0</b>        | <b>2.9</b>      | <b>0.78</b>    |
|         | <b>C</b>                        | <b>2.71</b>       | <b>1.0</b>        | <b>4.7</b>      | <b>C</b>                        | <b>3.14</b>       | <b>1.0</b>        | <b>1.3</b>      |                |
|         | <b>C</b>                        | <b>3.61</b>       | <b>1.0</b>        | <b>1.4</b>      |                                 |                   |                   |                 |                |

- 3  
 4 <sup>a</sup> Data were fit over a *k* range of 1 to 13 Å<sup>-1</sup>.  
 5 <sup>b</sup> Independent metal-ligand scattering environment  
 6 <sup>c</sup> Scattering atoms: O (oxygen), N (nitrogen), S (sulfur) and C (carbon), Cu (Copper)  
 7 <sup>d</sup> Average metal-ligand bond length from three independent samples  
 8 <sup>e</sup> Average metal-ligand coordination number from three independent samples  
 9 <sup>f</sup> Average Debye-Waller factor in Å<sup>2</sup> x 10<sup>3</sup> from three independent samples  
 10 <sup>g</sup> Number of degrees of freedom weighted mean square deviation between data and fit.

1 **SUPPLEMENTAL FIGURES**

2 **FIGURE 1S. Circular dichroism spectra of ArsD109 and tryptophan derivatives.**

3 CD spectra were collected with (●) 10  $\mu$ M ArsD109, ( $\Delta$ ) tryptophan-free W35Y/W97Y,  
4 (■) T15W and ( $\diamond$ ) V17W.

5 **FIGURE 2S. Activation of ArsA ATPase activity by ArsD109 and single tryptophan**

6 **derivatives.** Activated ArsA ATPase activity was determined at the indicated  
7 concentrations of sodium arsenite in the presence or absence of ArsD109 derivatives,

8 with the basal rate of hydrolysis subtracted from each set of data, as described under

9 Materials and Methods. The concentration of ArsA was 0.3  $\mu$ M, and ArsD was 6  $\mu$ M.

10 The concentration of As(III) required for half maximal activation is given in parentheses.

11 (●), no ArsD109 ( $K_{1/2}$  = 260  $\mu$ M); (○), parental ArsD109 ( $K_{1/2}$  = 25  $\mu$ M); (▼), tryptophan-

12 free W35Y/W97Y ( $K_{1/2}$  = 15  $\mu$ M); ( $\Delta$ ), T15W ( $K_{1/2}$  = 16  $\mu$ M). The data were fitted using

13 SigmaPlot 9.0, with error bars representing the standard deviation from three assays.

14 **FIGURE 3S. Effect of monothiols on binding of As(III) to ArsD109.** Fluorescence of

15 V17W was measured with excitation and emission wavelengths of 295 and 345 nm,

16 respectively. At the arrow the following additions were made: (●), 50  $\mu$ M As(III); ( $\nabla$ ), 5

17 mM L-cysteine followed by 50  $\mu$ M As(III); (■), 5 mM  $\beta$ -mercaptoethanol followed by 50

18  $\mu$ M As(III); ( $\diamond$ ), 2.5  $\mu$ M Sb(III).

19 **FIGURE 4S. As(GS)<sub>3</sub> does not activate ArsA.** Activated ATPase activity of 0.3  $\mu$ M

20 ArsA was determined at the indicated concentrations of sodium arsenite, with the basal

21 rate of hydrolysis subtracted from each set of data, as described under Materials and

22 Methods. (●), no addition; (○), 5 mM GSH; (■), 6  $\mu$ M ArsD109. The data were fitted

23 using SigmaPlot 9.0, with error bars representing the standard deviation from three

24 assays.

Figure 1S

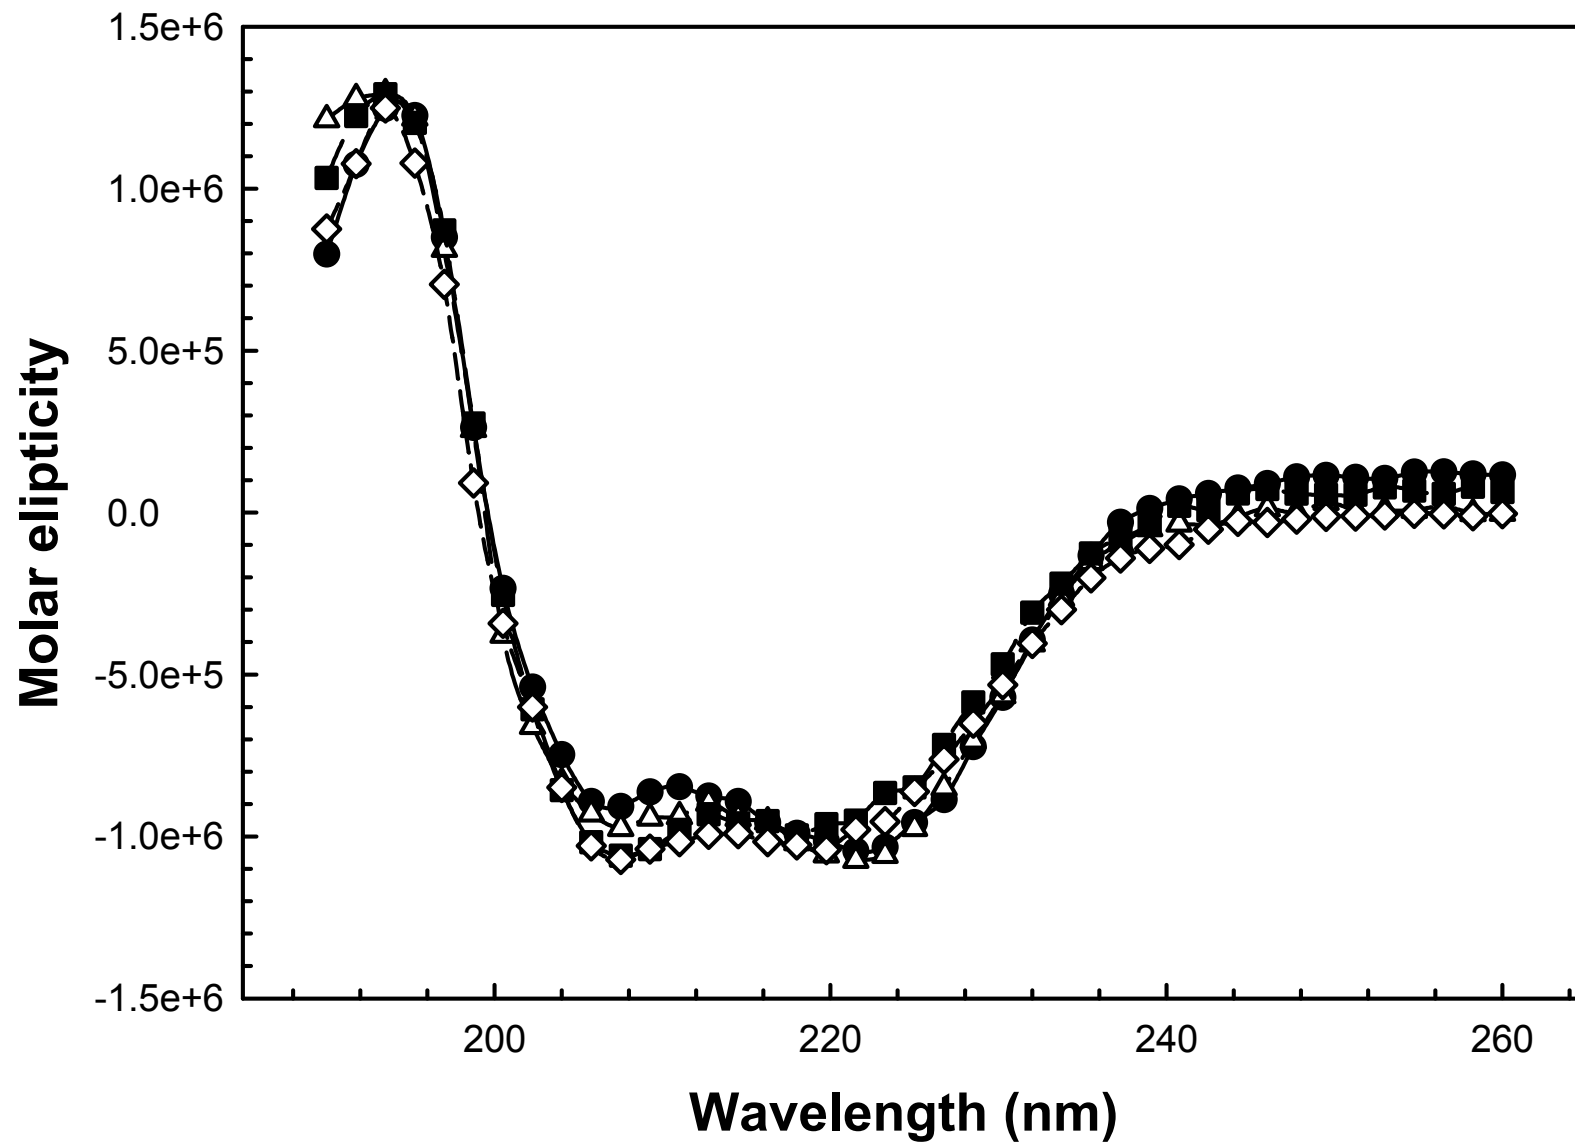

Figure 2S

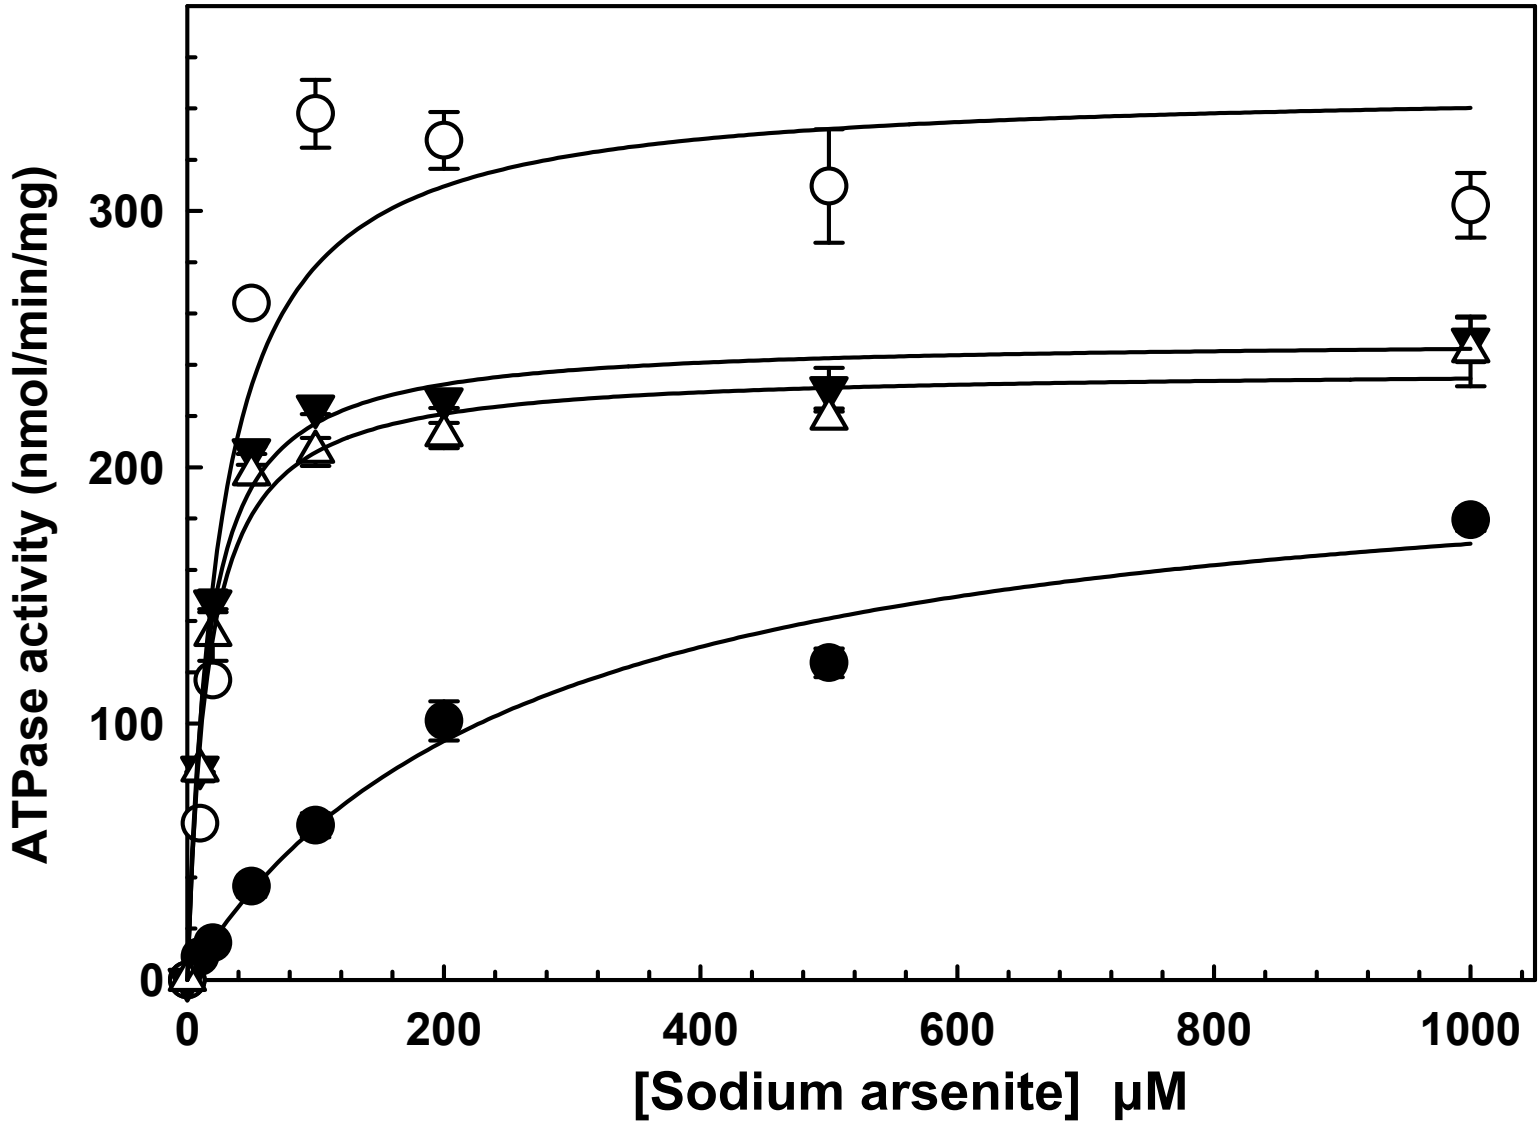

Figure 3S

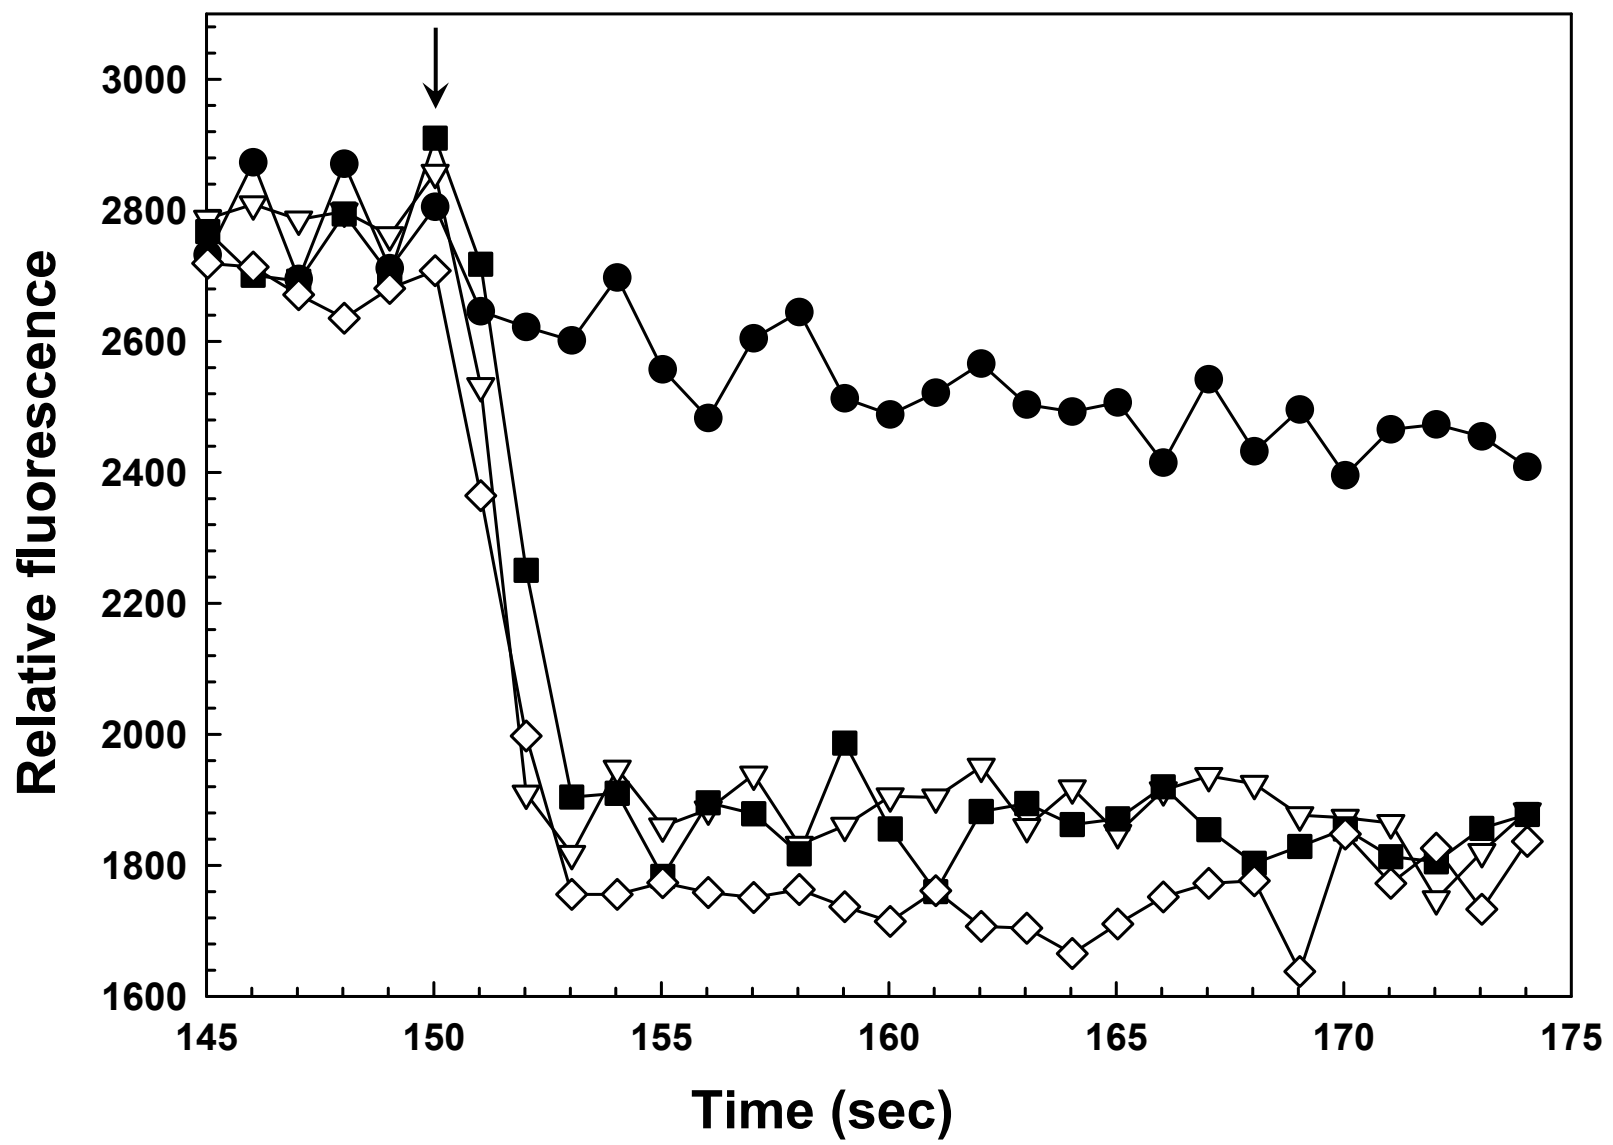

Figure 4S

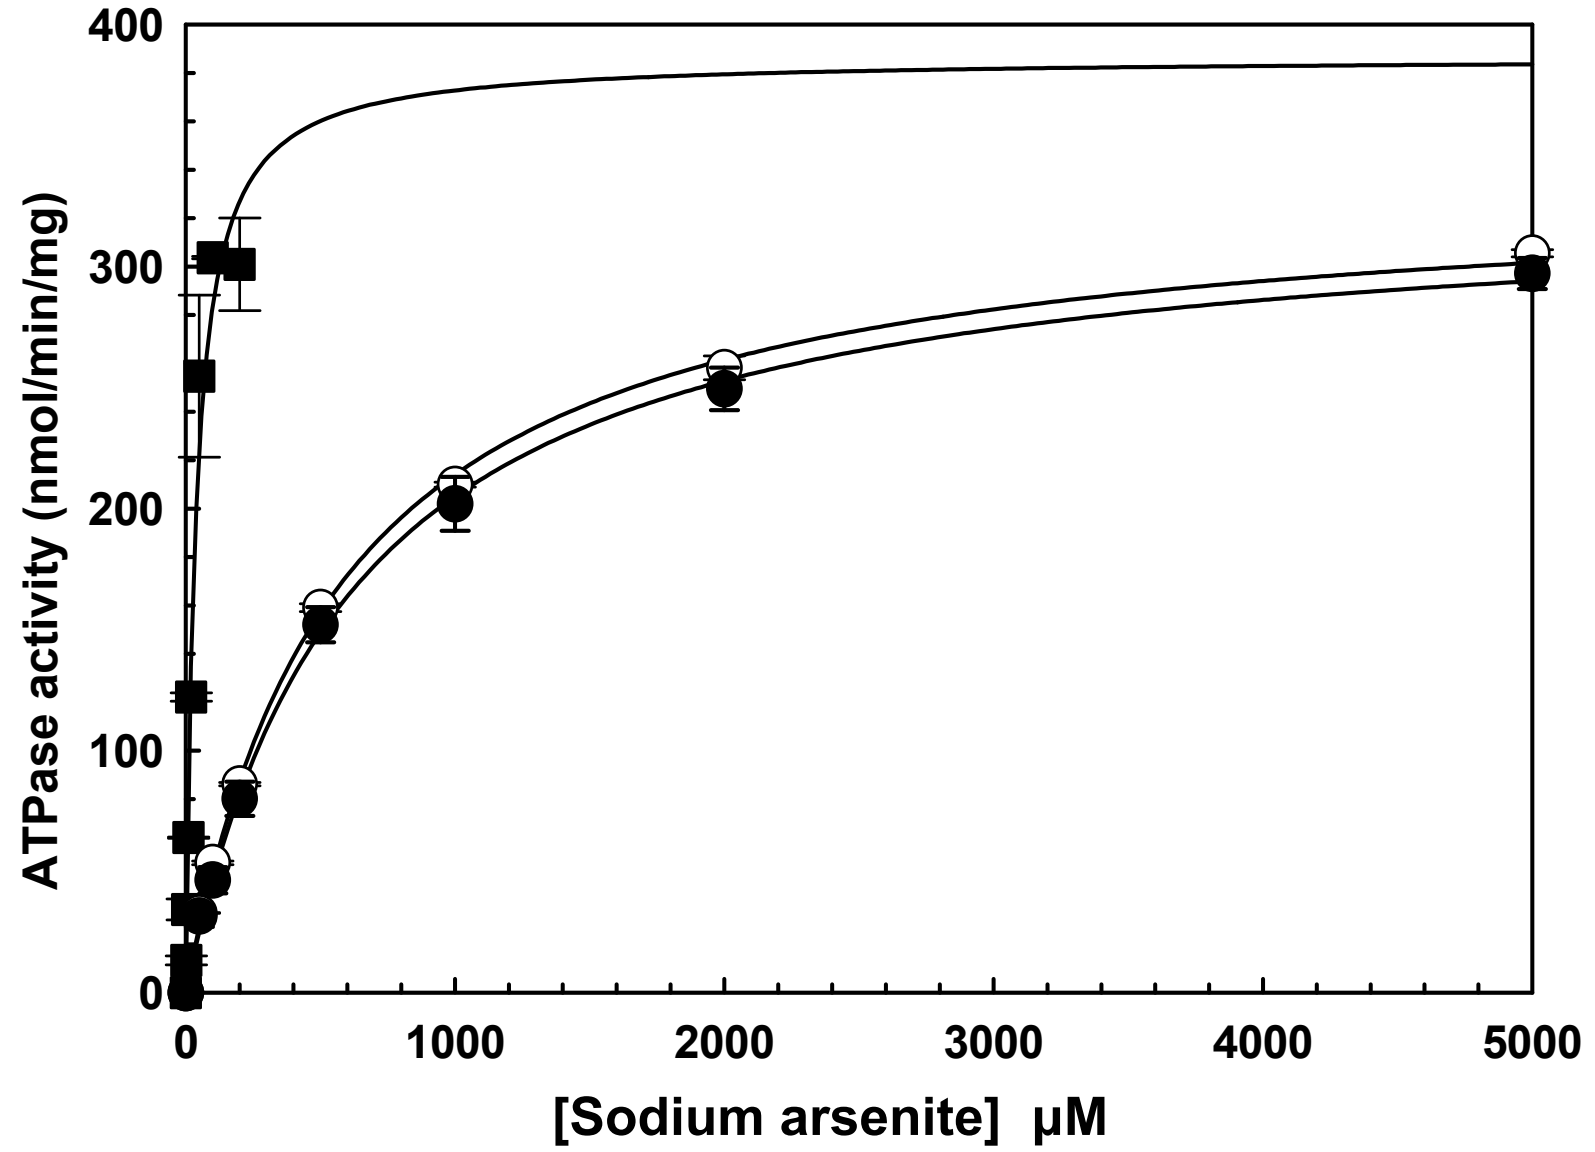

Supplement: NIHMS215332-supplement-supplement_1.pdf [file NIHMS215332-supplement-supplement_1.pdf]
